# Supplementary material for: Deletion of CTCF sites in the SHH locus alters enhancer–promoter interactions and leads to acheiropodia
Source: PubMed Central journal article supplement (PMC8052326; doi:10.1038/s41467-021-22470-z), 2021-04-16
Supplement: 41467_2021_22470_MOESM1_ESM.pdf [file 41467_2021_22470_MOESM1_ESM.pdf]

## Supplementary information

### Deletion of CTCF sites in the *SHH* locus alters enhancer-promoter interactions and leads to acheiropodia

Aki Ushiki<sup>1,2</sup>, Yichi Zhang<sup>1,2,3</sup>, Chenling Xiong<sup>1,2</sup>, Jingjing Zhao<sup>1,2</sup>, Ilias Georgakopoulos-Soares<sup>1,2</sup>, Lauren Kane<sup>4</sup>, Kirsty Jamieson<sup>2,5</sup>, Michael J. Bamshad<sup>6,7,8</sup>, Deborah A. Nickerson<sup>7,8</sup>, University of Washington Center for Mendelian Genomics, Yin Shen<sup>2,5</sup>, Laura A. Lettice<sup>4</sup>, Elizabeth Lemos Silveira-Lucas<sup>9</sup>, Florence Petit<sup>10</sup>, Nadav Ahituv<sup>1,2\*</sup>

<sup>1</sup> Department of Bioengineering and Therapeutic Sciences, University of California San Francisco, San Francisco, CA 94158, USA.

<sup>2</sup> Institute for Human Genetics, University of California San Francisco, San Francisco, CA 94158, USA.

<sup>3</sup> School of Pharmaceutical Sciences, Tsinghua University, Beijing, 100084, China

<sup>4</sup> MRC Human Genetics Unit, Institute of Genetics and Molecular Medicine, University of Edinburgh, Crewe Road, Edinburgh EH4 2XU, UK

<sup>5</sup> Department of Neurology, University of California San Francisco, San Francisco, CA 94158, USA.

<sup>6</sup> Department of Pediatrics, University of Washington, Seattle, WA 98195, USA.

<sup>7</sup> Department of Genome Sciences, University of Washington, Seattle, WA 98195, USA.

<sup>8</sup> Brotman-Baty Institute, Seattle, WA 98195, USA.

<sup>9</sup> Consultorio Genetica Clinica, Porto Alegre, 90440, Brazil

<sup>10</sup> CHU Lille, University of Lille, EA7364 RADEME, F-59000, Lille, France.

## Supplementary information for UW-CMG

### University of Washington Center for Mendelian Genomics (UW-CMG)

Peter Anderson<sup>11</sup>, Suzanne M. Leal<sup>12</sup>, Tamara J. Bacus<sup>11</sup>, Elizabeth E. Blue<sup>11</sup>, Kati J. Buckingham<sup>11</sup>, Jessica X. Chong<sup>11</sup>, Diana Cornejo Sánchez<sup>12</sup>, Colleen P. Davis<sup>11</sup>, Christian D. Frazar<sup>11</sup>, Danielle Giroux<sup>11</sup>, William W. Gordon<sup>11</sup>, Martha Horike-Pyne<sup>11</sup>, Jameson R. Hurless<sup>11</sup>, Gail P. Jarvik<sup>11</sup>, Eric Johanson<sup>11</sup>, J. Thomas Kolar<sup>11</sup>, Melissa P. MacMillan<sup>11</sup>, Colby T. Marvin<sup>11</sup>, Sean McGee<sup>11</sup>, Daniel J. McGoldrick<sup>11</sup>, Betselote Mekonnen<sup>11</sup>, Patrick M. Nielsen<sup>11</sup>, Karynne Patterson<sup>11</sup>, Benjamin Pelle<sup>11</sup>, Aparna Radhakrishnan<sup>11</sup>, Matthew A. Richardson<sup>11</sup>, Gwendolin T. Roote<sup>11</sup>, Erica L. Ryke<sup>11</sup>, Isabelle Schrauwen<sup>12</sup>, Kathryn M. Shively<sup>11</sup>, Joshua D. Smith<sup>11</sup>, Monica Tackett<sup>11</sup>, Machiko S. Threlkeld<sup>11</sup>, Gao Wang<sup>12</sup>, Jeffrey M. Weiss<sup>11</sup>, Marsha M. Wheeler<sup>11</sup>, Qian Yi<sup>11</sup>, Jordan E. Zeiger<sup>11</sup>, and Xiaohong Zhang<sup>11</sup>

<sup>11</sup> University of Washington

<sup>12</sup> Columbia University

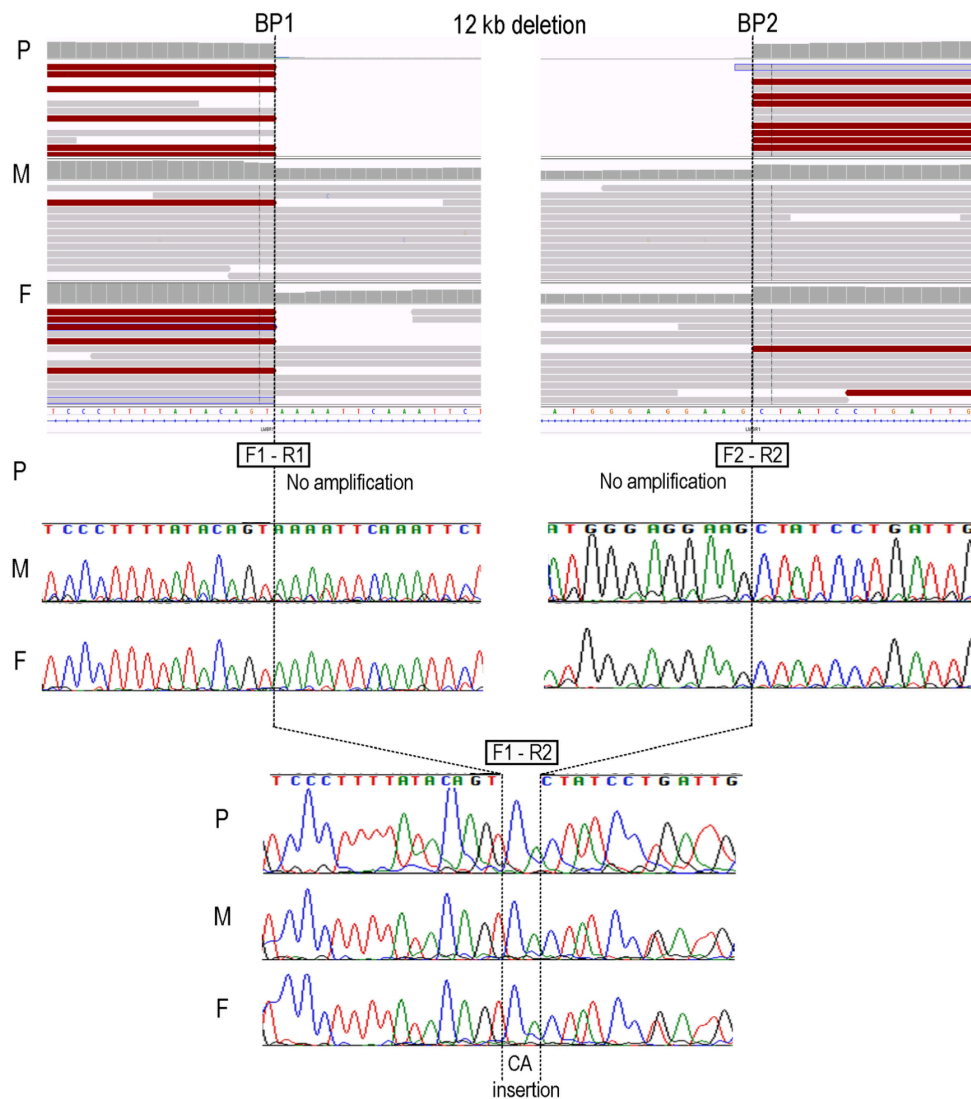

**Supplementary Fig. 1 | Sequencing analyses of the acheiropodia-associated deletion.**

WGS alignments showing the homozygous 12 kb deletion in the acheiropodia proband, with red lines indicating truncated reads (upper panel). The deletion appears heterozygous in both parents. Sanger sequencing of the breakpoint in the acheiropodia proband and her parents using three different primer pairs (lower). Variant Chr7(GRCh37):g.156608724\_156620764delinsCA is homozygous in the proband and heterozygous in the parents. BP: breakpoint; P: proband; M: mother; F: father.



**Supplementary Fig. 2 | ENCODE histone modification ChIP-seq peaks in the acheiropodia-associated deleted region.**

ChIP-seq datasets of ten different histone modifications from 18 different cell lines around the 12 kb acheiropodia-associated deletion (highlighted in blue).



**Supplementary Fig. 3 | ENCODE CTCF ChIP-seq peaks in the acheiropodia-associated deleted region.**

CTCF ChIP-seq peaks around the 12 kb acheiropodia-associated deletion (highlighted in blue) showing the three CTCF sites located in this region. The number of ChIP-seq assays that have a significantly enriched CTCF peak versus the number of assays are noted for each peak in the track above and below are all the individual assay results.

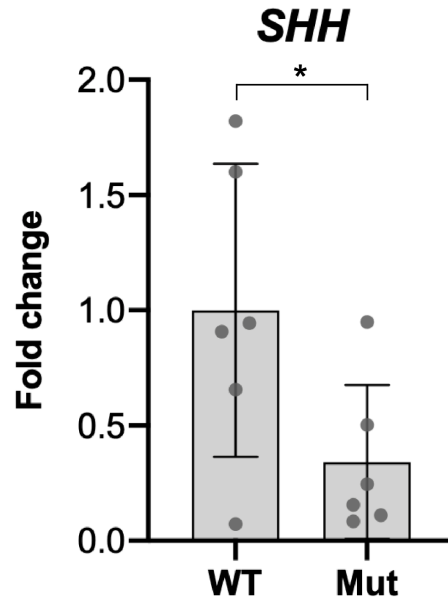

**Supplementary Fig. 4 | *SHH* gene expression levels in the lymphoblastoid cell lines.**

*SHH* gene expression levels from wild type (WT) and acheiropodia (Mut) lymphoblastoid cells as determined by qRT-PCR. Each value represents the ratio of *SHH* gene expression to that of *hypoxanthine phosphoribosyltransferase 1* gene, and values are mean  $\pm$  standard deviation. The expression value of WT was arbitrarily set at 1.0. Each dot represents an individual replicate and statistical differences were determined using a two-sided unpaired *t*-test. Source data are provided as a Source Data file. \**P*-value=0.0486.



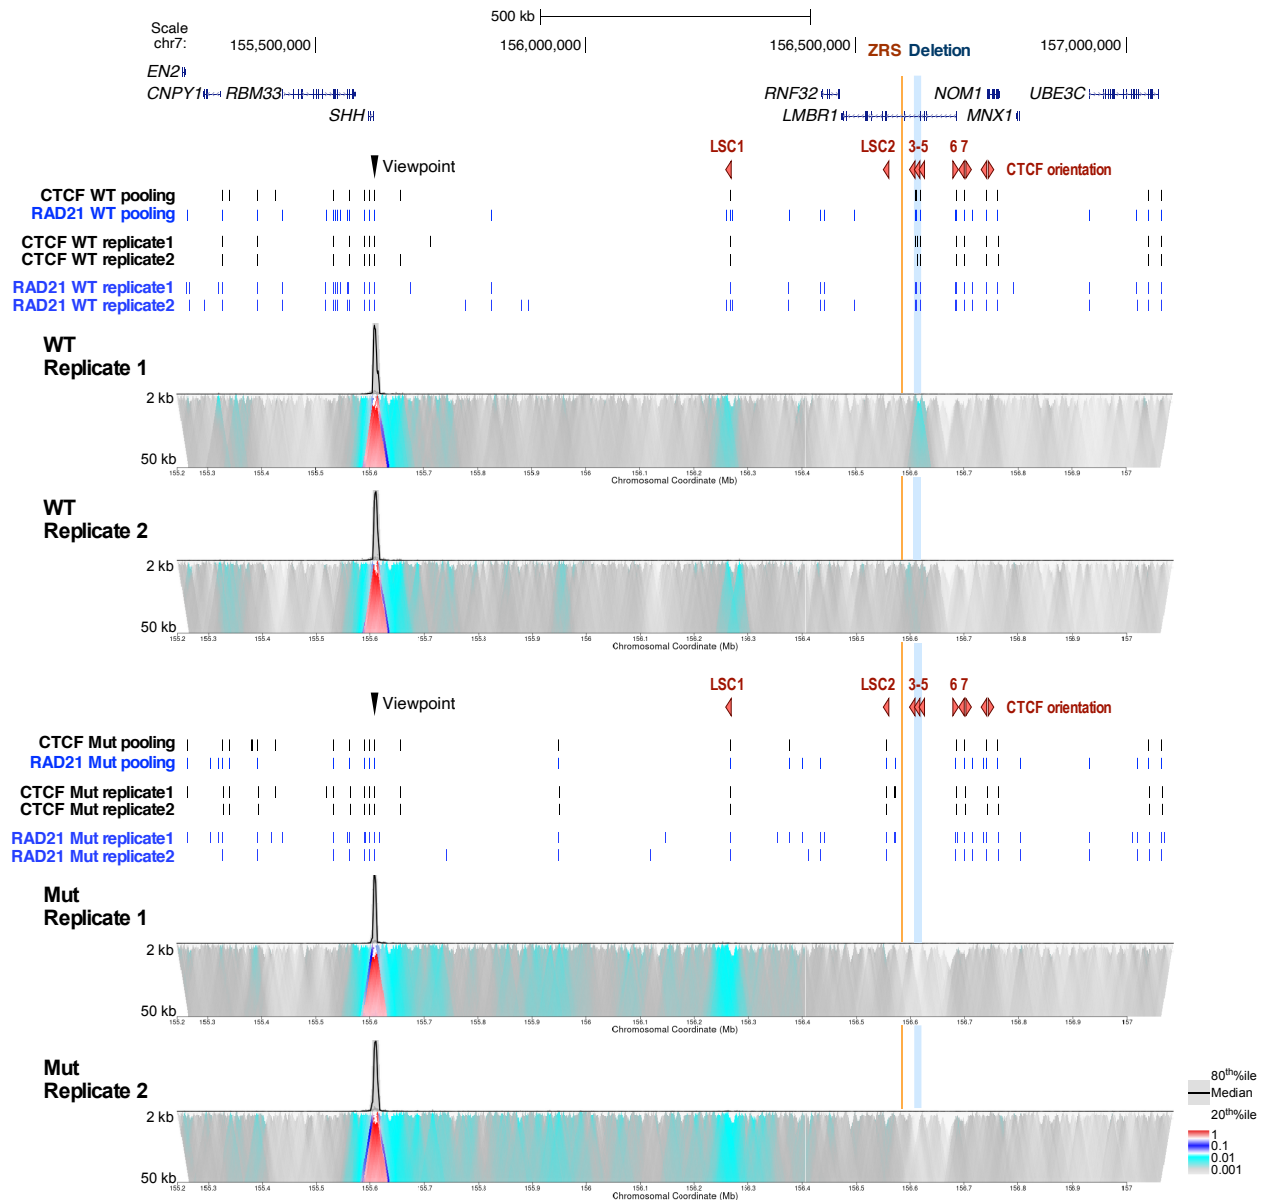

**Supplementary Fig. 5 | ChIP-seq and 4C-seq replicate data in the *LMBR1-SHH* locus.**

CTCF (black) and RAD21 (blue) ChIP-seq enrichment in lymphoblastoid cells from wildtype (WT) and proband (Mut) at the *LMBR1-SHH* locus for two technical replicates. The ZRS and the acheiropodia-associated deleted region are shown in orange and blue vertical lines respectively and CTCF orientations are shown as red triangles. Below are the results from two technical replicates of 4C-seq, showing 4C contact profiles in lymphoblastoid cells from wildtype (WT) and proband (Mut). The viewpoint is depicted

by a black arrowhead. The median and 20th and 80th percentiles of sliding 2-50 kb windows determine the main trend line. The color scale represents enrichment relative to the maximum medium value attainable at 12 kb resolution.

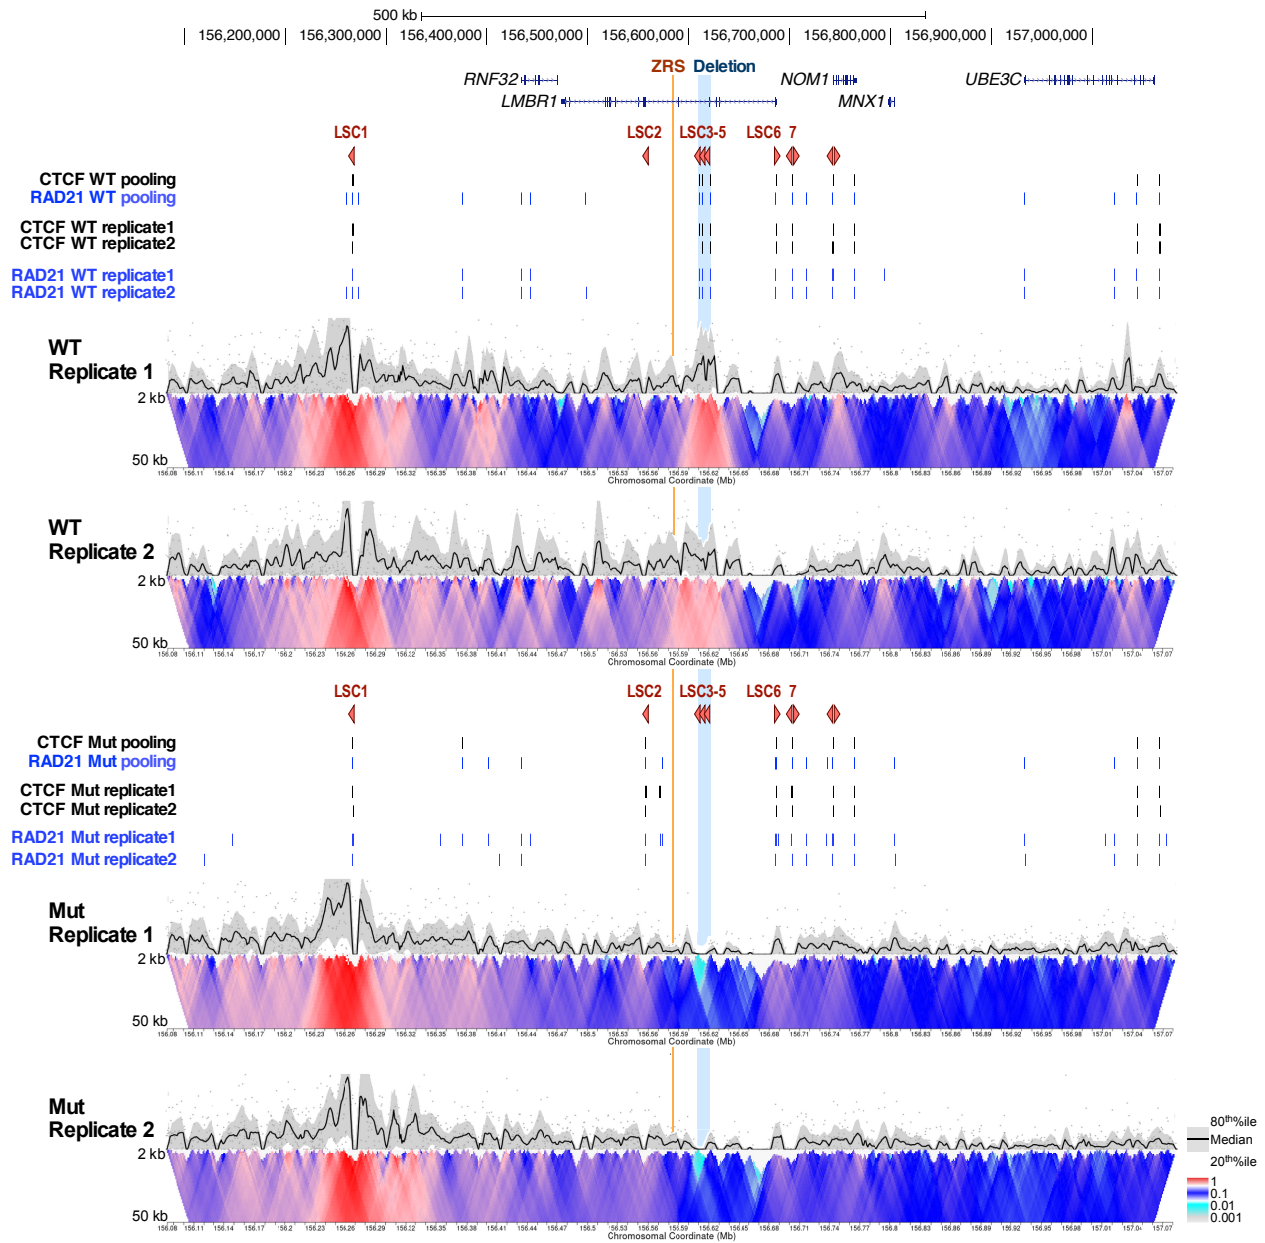

### Supplementary Fig. 6 | ChIP-seq and 4C-seq replicate data around *LMBR1*.

CTCF (black) and RAD21 (blue) ChIP-seq enrichment in lymphoblastoid cells from wildtype (WT) and proband (Mut) at the *LMBR1* locus for two technical replicates. The ZRS and the achiropodia-associated deleted region are shown in orange and blue vertical lines respectively and CTCF orientations are shown as red triangles. Below are the results from two technical replicates of 4C-seq, showing 4C contact profiles in lymphoblastoid cells from wildtype (WT) and proband (Mut). The viewpoint is depicted

by a black arrowhead. The median and 20th and 80th percentiles of sliding 2-50 kb windows determine the main trend line. The color scale represents enrichment relative to the maximum medium value attainable at 12 kb resolution.

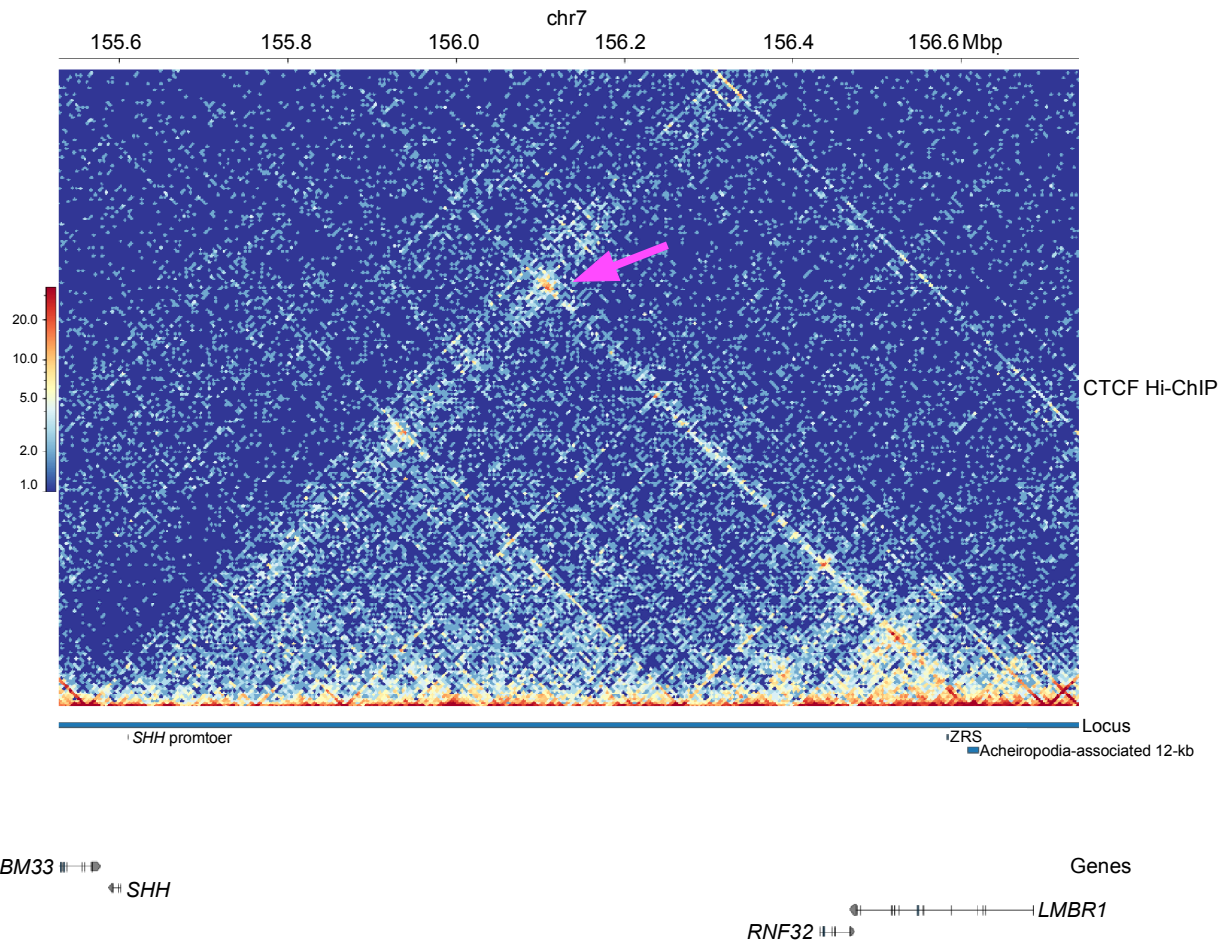

**Supplementary Fig. 7 | CTCF Hi-ChIP Interactions in GM12878 cell line.**

Interactions in the *SHH* locus from CTCF Hi-ChIP data<sup>1</sup>. The pink arrow indicates the interaction between the *SHH* promoter and the achiropodia associated 12 kb region.

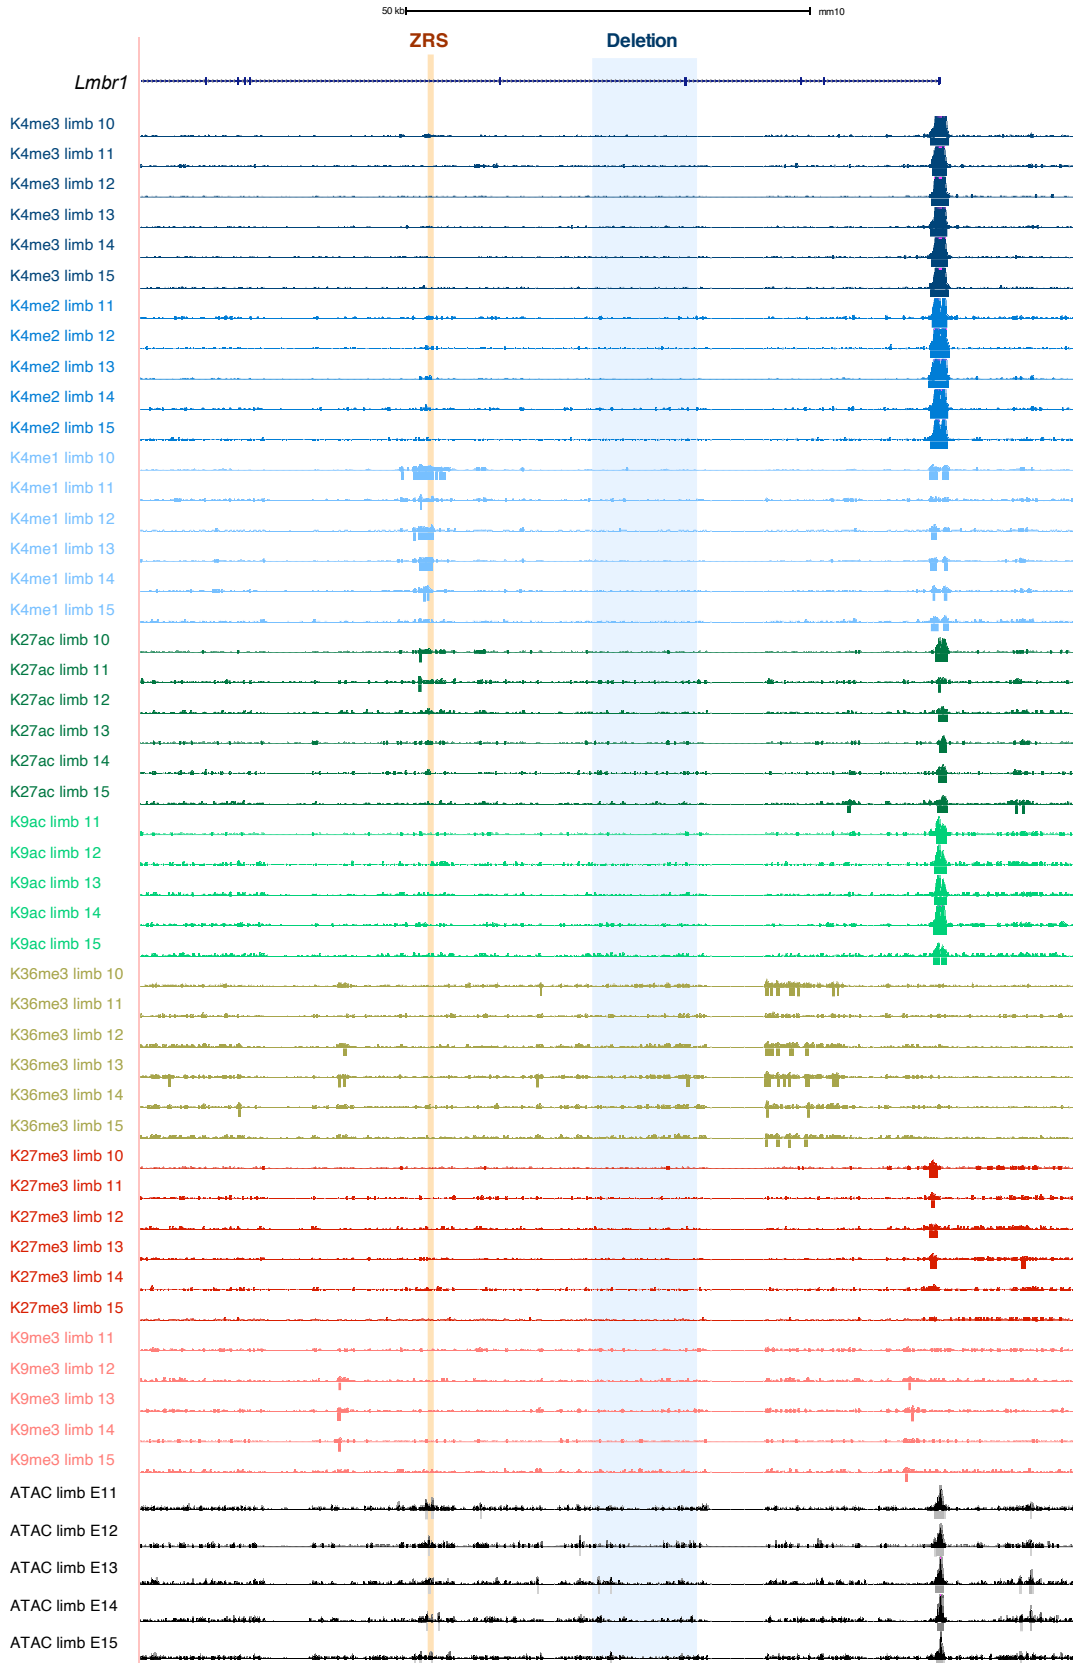

**Supplementary Fig. 8 | Mouse ENCODE histone modification ChIP-seq and ATAC-seq peaks around *Lmbr1*.**

Histone modification (H3K4me3, H3K4me1, H3K27ac, H3K9ac, H3K36me3, H3K27me3, H3K9me3) ChIP-seq and ATAC-seq peaks from mouse E10.5-E15.5 limbs. The ZRS and the acheiropodia-associated deleted region are shown as orange and blue vertical lines respectively.

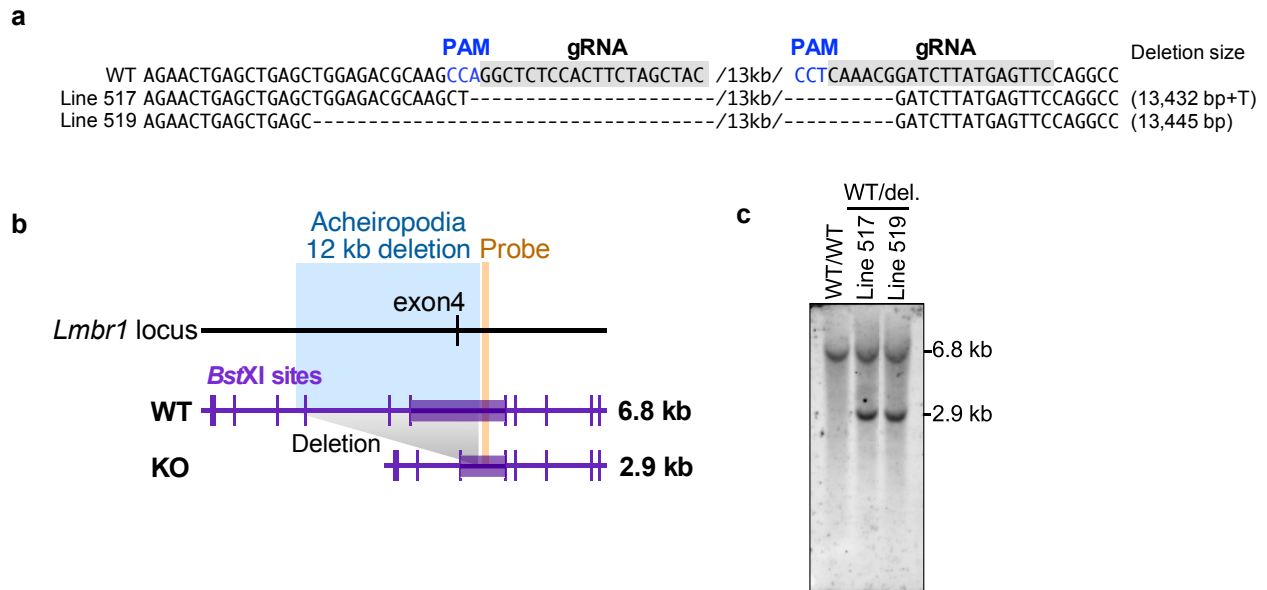

**Supplementary Fig. 9 | Sanger sequencing and southern blot analyses of the 12 kb mouse deleted region.**

**a**, Sanger sequencing results for mouse line 517 and 519. The PAM motif is depicted in blue font and gRNA sequences are shaded in gray. **b**, Location of the *Bst*XI restriction enzyme sites (purple lines) in wild type (WT) and knockout (KO) loci. The deletion and probe location are shown as blue and orange rectangle respectively. Expected band sizes in WT and KO are written to the right of the map. **c**, Southern blot analyses of wild type (WT) and heterozygous knockout mice with the estimated band size written to the right of the blot. Southern blot analyses were performed several times using founder and F1 generation.



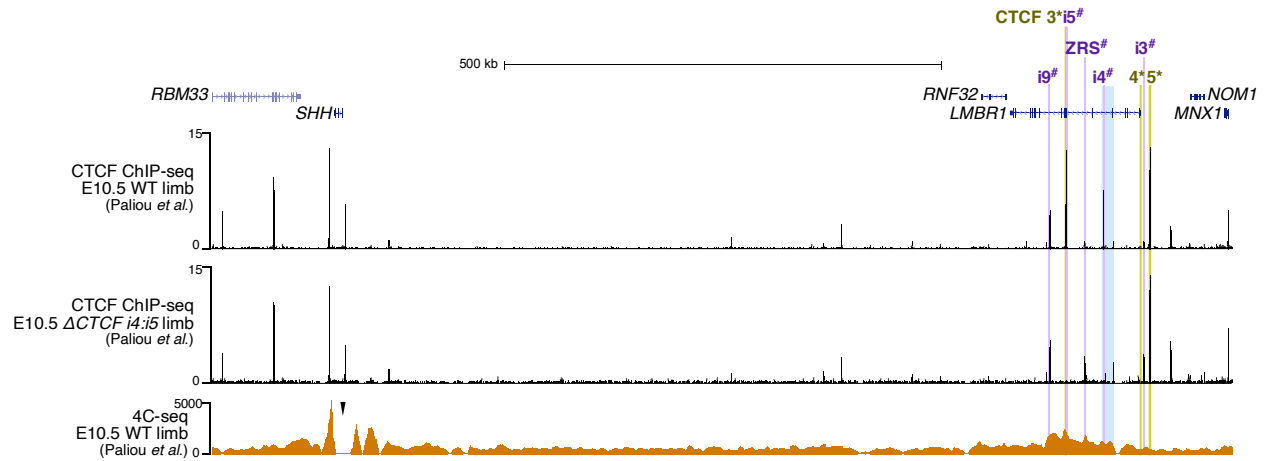

**Supplementary Fig. 10 | Mouse CTCF ChIP-seq and 4C-seq peaks around the *Lmbr1-Shh* locus.**

Mouse E10.5 limb CTCF ChIP-seq data and 4C-seq data from Paliou *et al.*<sup>2</sup>. The *Shh* viewpoint is depicted via a black arrowhead. CTCF site deletions analyzed by Paliou *et al.*<sup>2</sup> are marked by purple lines and # and those generated by Williamson *et al.*<sup>3</sup> are denoted by yellow lines or gray rectangle, and marked by \*.

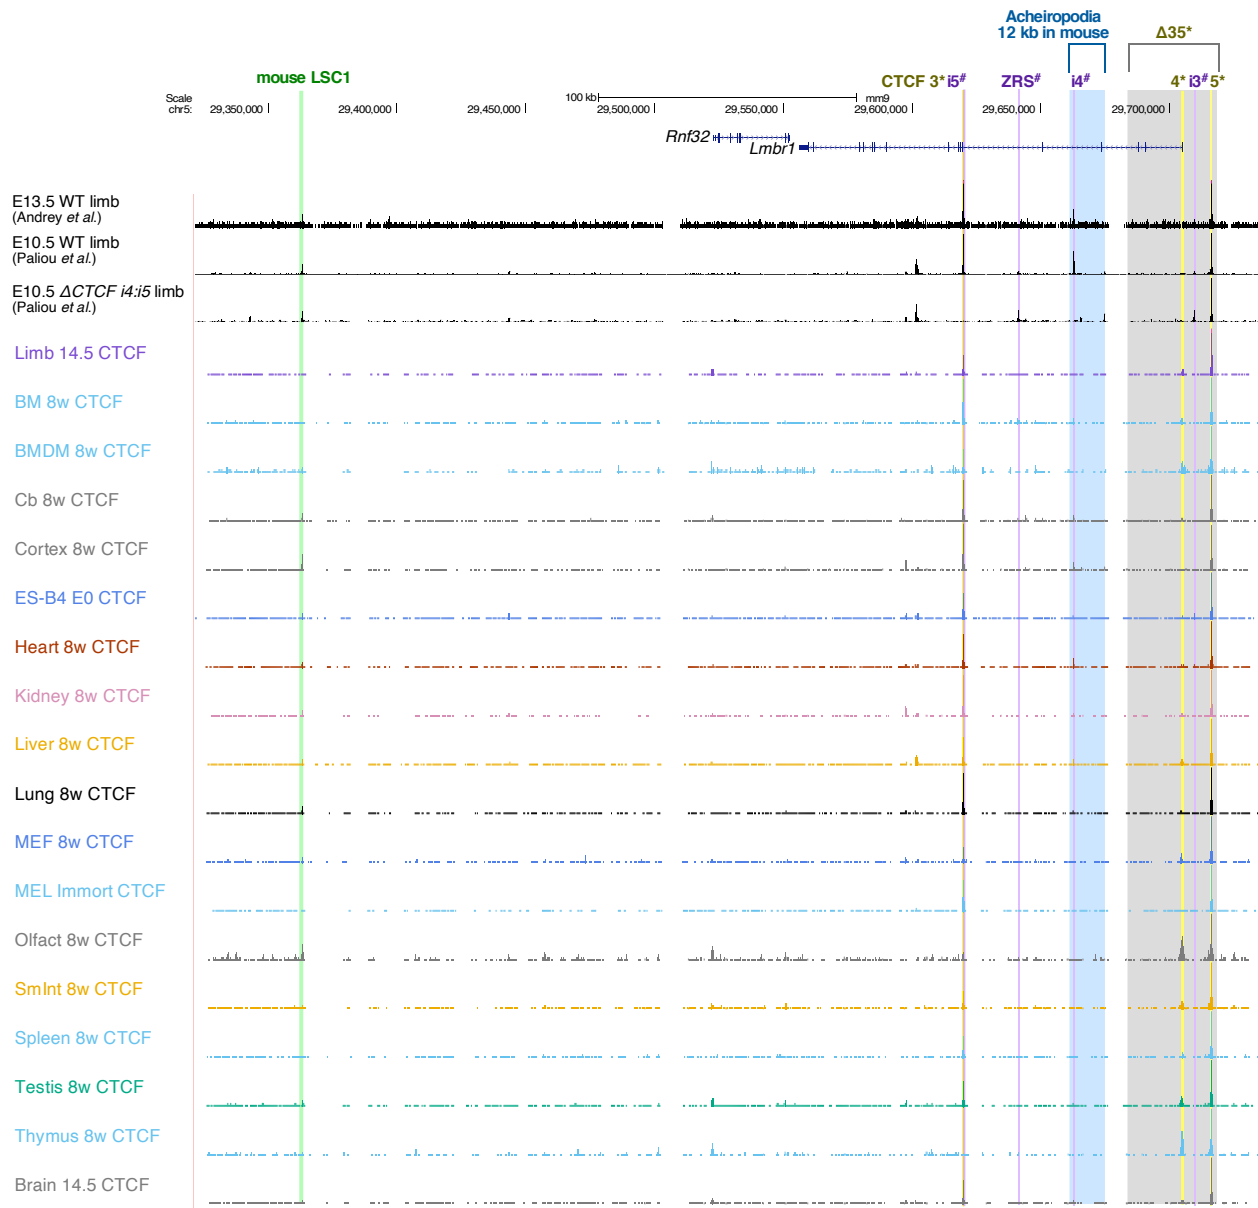

**Supplementary Fig. 11 | Mouse ENCODE CTCF ChIP-seq peaks around *Lmbr1*.**

CTCF ChIP-seq from developing mouse limbs<sup>3,2</sup> and ENCODE<sup>4</sup> from various tissues/cells. CTCF site deletions analyzed by Paliou *et al.*<sup>2</sup> are marked by # and purple lines and those generated by Williamson *et al.*<sup>3</sup> are denoted by yellow lines or gray rectangle and marked by \*. The mouse LSC1 CTCF site is marked by a green line. The mouse orthologous sequence for the acheiropodia-associated deletion is depicted by a blue rectangle.

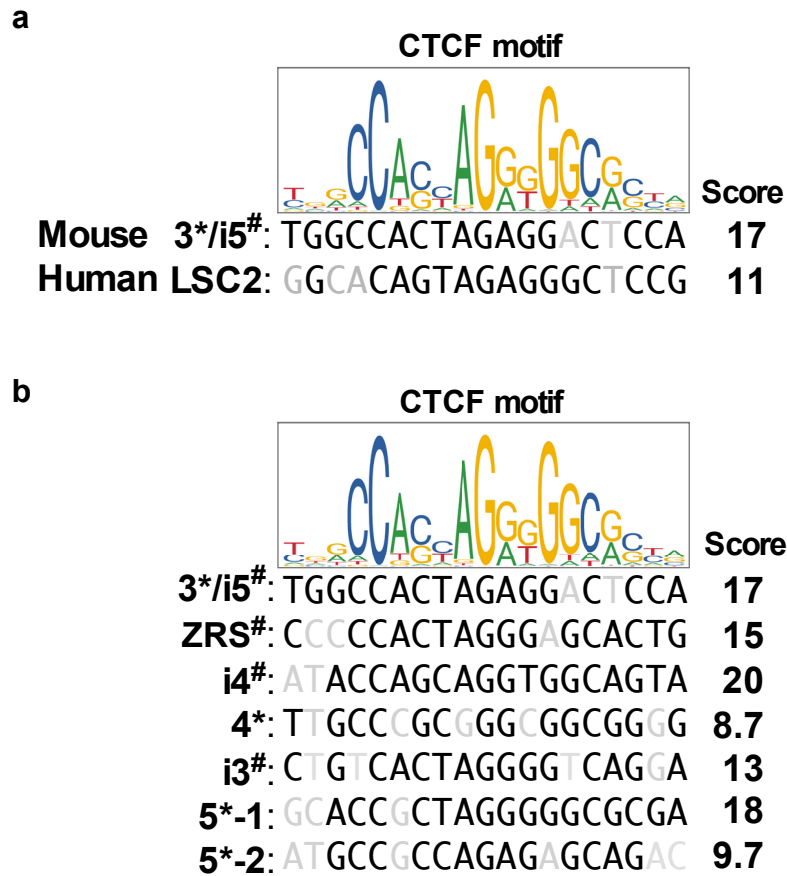

**Supplementary Fig. 12 | Mouse CTCF motifs around the *Lmbr1* gene.**

**a-b**, CTCF motif from JASPAR<sup>5</sup> [<http://jaspar.genereg.net/>] and motif scores, as assigned by FIMO<sup>6</sup>, for 3\*/i5# mouse and human LSC2 (**a**) and mouse CTCF sequences analyzed in previous studies<sup>3,2</sup> (**b**). The 5\* contains two CTCF sites and shown as 5\*-1 and 2.

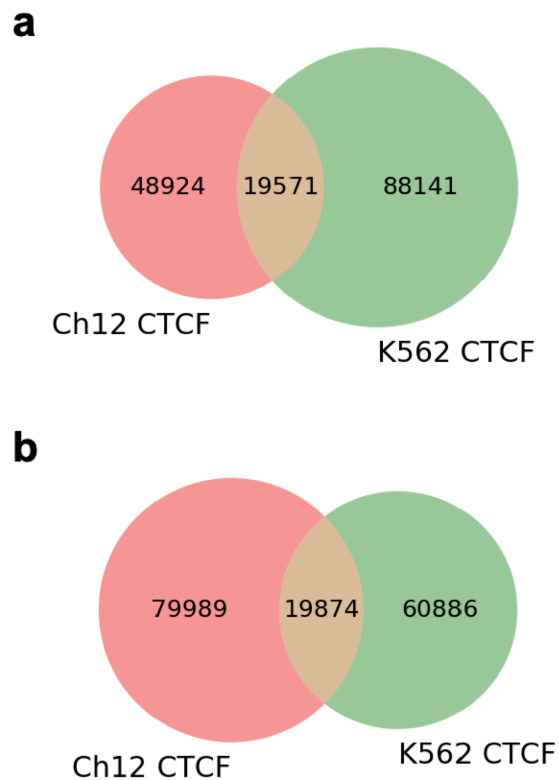

**Supplementary Fig. 13 | Venn diagram showing overlap between human and mouse CTCF ChIP-seq peaks.**

**a**, Venn diagram showing the overlap between CH12 CTCF-ChIP peaks that were converted to human (hg19) using the liftOver tool in the UCSC Genome Browser<sup>7</sup> with human K562 CTCF-ChIP peaks. **b**, Venn diagram showing the overlap between K562 CTCF-ChIP peaks that were converted to mouse (mm9) using the liftOver tool in the UCSC Genome Browser<sup>7</sup> with mouse CH12 CTCF-ChIP peaks.

# LMBR1

## HEPG2

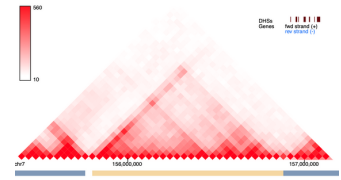

## GM12878

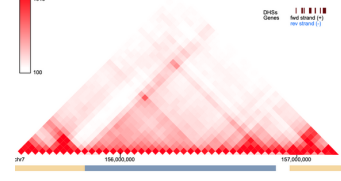

## NHEK

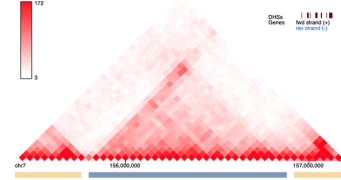

## K562

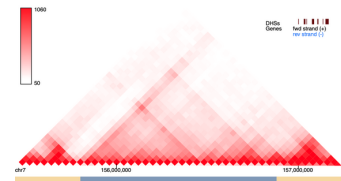

## HMEC

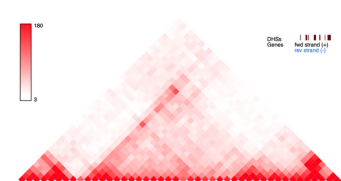

# DNAJB6

## H1-ES

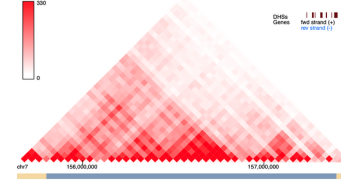

## G401

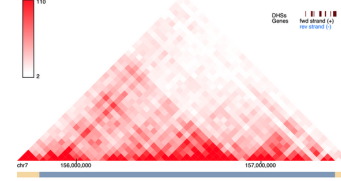

## A549

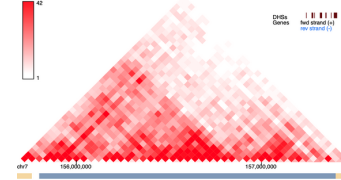

## Epidermal Keratinocyte day6

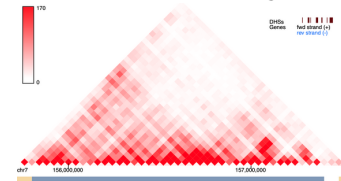

## Hippocampus

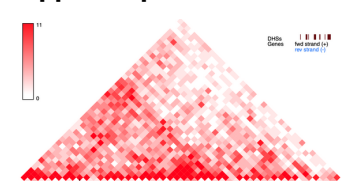

**Supplementary Fig. 14 | TAD boundaries in the human *LMBR1-SHH* locus from ten different cell types.**

Hi-C datasets analyzed via the 3D Genome Browser<sup>8</sup> for ten different human cells lines showing the location of the TAD boundaries in the *SHH-LMBR1* locus. Above each Hi-C heatmap is the name of the cell type/tissue, gray and orange bars show the TAD structure and below are the location of the various genes in this locus.

## Supplementary Table 1 | Homozygosity mapping results for individual VI-2, affected with acheiropodia.

| CHR | SNP1              | SNP2             | POS1             | POS2             | KB              | NSNP       | DENSITY      | PHOM         | PHET         |
|-----|-------------------|------------------|------------------|------------------|-----------------|------------|--------------|--------------|--------------|
| 1   | rs2744778         | rs537951         | 26013252         | 27374218         | 1360.966        | 538        | 2.53         | 0.998        | 0.002        |
| 1   | rs10437318        | rs272817         | 35403677         | 36646491         | 1242.814        | 302        | 4.115        | 1            | 0            |
| 1   | rs7556311         | exm58332         | 49123567         | 51584465         | 2460.898        | 150        | 16.406       | 0.993        | 0.007        |
| 1   | exm92700          | exm95637         | 147380101        | 150991132        | 3611.031        | 439        | 8.226        | 0.991        | 0.009        |
| 1   | rs3131323         | rs3908502        | 177719196        | 180591237        | 2872.041        | 631        | 4.552        | 0.998        | 0.002        |
| 2   | exm201593         | exm2255484       | 72359400         | 73466812         | 1107.412        | 128        | 8.652        | 0.984        | 0.016        |
| 2   | kgp8786363        | exm216367        | 99554388         | 100623395        | 1069.007        | 198        | 5.399        | 0.995        | 0.005        |
| 2   | exm260784         | exm2254932       | 209138368        | 210810644        | 1672.276        | 230        | 7.271        | 0.987        | 0.013        |
| 3   | rs722615          | rs2346021        | 5899967          | 11700713         | 5800.746        | 1360       | 4.265        | 0.996        | 0.001        |
| 3   | exm319359         | exm323508        | 51968725         | 52988425         | 1019.7          | 727        | 1.403        | 0.997        | 0.003        |
| 3   | rs11128158        | rs1437528        | 66668365         | 77950703         | 11282.338       | 1552       | 7.27         | 0.999        | 0            |
| 3   | rs9861237         | rs6800203        | 85402469         | 86466286         | 1063.817        | 103        | 10.328       | 0.981        | 0.019        |
| 3   | rs1838554         | rs16826629       | 105927328        | 117017073        | 11089.745       | 2040       | 5.436        | 1            | 0            |
| 3   | rs990739          | rs11919380       | 142926765        | 148993158        | 6066.393        | 842        | 7.205        | 1            | 0            |
| 3   | rs4856678         | rs13082820       | 162092216        | 164926605        | 2834.389        | 285        | 9.945        | 0.996        | 0.004        |
| 3   | rs6778567         | rs12489012       | 192611340        | 197833758        | 5222.418        | 1286       | 4.061        | 0.998        | 0            |
| 4   | rs7693293         | rs13152405       | 5093523          | 14497339         | 9403.816        | 1995       | 4.714        | 0.997        | 0.001        |
| 4   | rs7693369         | exm431870        | 158778839        | 159894391        | 1115.552        | 191        | 5.841        | 0.99         | 0.01         |
| 5   | exm-rs9292862     | rs4866772        | 43028221         | 44208106         | 1179.885        | 143        | 8.251        | 0.993        | 0.007        |
| 5   | rs1011814         | rs7293455        | 44335820         | 46399093         | 2063.273        | 107        | 19.283       | 0.991        | 0.009        |
| 5   | rs6888236         | exm476641        | 130215911        | 131649405        | 1433.494        | 197        | 7.277        | 0.99         | 0.01         |
| 5   | rs437220          | exm2261872       | 160545841        | 164306736        | 3760.895        | 418        | 8.997        | 0.998        | 0.002        |
| 6   | exm2270422        | exm584615        | 145677803        | 146755072        | 1077.269        | 127        | 8.482        | 0.984        | 0.016        |
| 7   | rs6956395         | rs1425132        | 28072245         | 37562368         | 9490.123        | 1642       | 5.78         | 0.999        | 0.001        |
| 7   | rs17139634        | newsr148500031   | 64902831         | 66458309         | 1555.478        | 105        | 14.814       | 1            | 0            |
| 7   | <b>rs12719966</b> | <b>rs1985369</b> | <b>155149037</b> | <b>159119220</b> | <b>3970.183</b> | <b>715</b> | <b>5.553</b> | <b>0.999</b> | <b>0.001</b> |
| 8   | exm687695         | rs10958798       | 22031177         | 43791691         | 21760.514       | 4002       | 5.437        | 0.999        | 0            |
| 8   | rs7836486         | rs10111120       | 46942842         | 51564759         | 4621.917        | 383        | 12.068       | 0.997        | 0.003        |
| 8   | rs1560846         | rs4739127        | 77529466         | 78749262         | 1219.796        | 140        | 8.713        | 1            | 0            |
| 8   | exm711859         | indel.101907     | 99168279         | 101020788        | 1852.509        | 265        | 6.991        | 0.989        | 0.011        |
| 8   | rs10093778        | exm716475        | 112488761        | 113563079        | 1074.318        | 111        | 9.679        | 0.991        | 0.009        |
| 9   | rs7023466         | rs10046802       | 93005808         | 94437294         | 1431.486        | 201        | 7.122        | 0.995        | 0.005        |
| 9   | exm772873         | rs3750473        | 115336625        | 121468282        | 6131.657        | 1426       | 4.3          | 0.999        | 0.001        |
| 11  | exm869284         | rs7933771        | 193146           | 3851383          | 3658.237        | 1720       | 2.127        | 0.999        | 0.001        |
| 11  | rs747190          | exm2271460       | 8360804          | 9383450          | 1022.646        | 264        | 3.874        | 0.992        | 0.004        |
| 11  | rs1228020         | rs7944067        | 47953477         | 51525878         | 3572.401        | 340        | 10.507       | 0.991        | 0.009        |
| 11  | rs34944111        | exm909841        | 54794237         | 56310621         | 1516.384        | 639        | 2.373        | 0.997        | 0.002        |
| 11  | rs6590849         | rs2509689        | 101218094        | 102368719        | 1150.625        | 202        | 5.696        | 0.99         | 0.01         |
| 11  | exm959555         | exm963044        | 118037610        | 119290776        | 1253.166        | 671        | 1.868        | 1            | 0            |
| 13  | rs861014          | rs9538147        | 30629904         | 59200490         | 28570.586       | 4734       | 6.035        | 0.999        | 0            |
| 13  | rs9542637         | rs9516998        | 71849406         | 98318333         | 26468.927       | 3392       | 7.803        | 0.999        | 0            |
| 13  | exm2267622        | rs7991842        | 105386176        | 111056745        | 5670.569        | 999        | 5.676        | 0.999        | 0            |
| 14  | rs10132552        | rs10149476       | 101301012        | 107287663        | 5986.651        | 1201       | 4.985        | 0.999        | 0.001        |
| 15  | exm1156252        | exm1157672       | 43767774         | 44918698         | 1150.924        | 284        | 4.053        | 0.996        | 0.004        |
| 15  | rs12594225        | rs2163369        | 56102536         | 57164889         | 1062.353        | 171        | 6.213        | 0.982        | 0.012        |
| 15  | rs4369593         | rs736827         | 59697016         | 79358866         | 19661.85        | 4248       | 4.628        | 0.999        | 0            |
| 15  | exm1182904        | rs1256424        | 82336141         | 83524257         | 1188.116        | 174        | 6.828        | 0.983        | 0.017        |
| 16  | exm2274844        | rs11075685       | 66511561         | 68625435         | 2113.874        | 907        | 2.331        | 0.999        | 0.001        |
| 16  | rs9783747         | exm1255596       | 69458193         | 71319312         | 1861.119        | 432        | 4.308        | 0.988        | 0.009        |
| 16  | rs9319574         | rs2244455        | 82843167         | 84910657         | 2067.49         | 917        | 2.255        | 0.998        | 0.001        |
| 17  | rs8082686         | rs8067558        | 12545054         | 14598385         | 2053.331        | 410        | 5.008        | 0.998        | 0            |
| 17  | exm1324419        | exm1888089       | 40556776         | 41926141         | 1369.365        | 571        | 2.398        | 0.996        | 0.004        |
| 17  | rs3921965         | rs7209936        | 72031792         | 80926215         | 8894.423        | 3985       | 2.232        | 1            | 0            |
| 18  | rs11875045        | rs4798481        | 5193132          | 6693107          | 1499.975        | 241        | 6.224        | 1            | 0            |
| 18  | rs4891065         | rs12456851       | 73089473         | 78014582         | 4925.109        | 893        | 5.515        | 1            | 0            |
| 19  | rs308054          | exm1414040       | 3105987          | 6467966          | 3361.979        | 1291       | 2.604        | 0.998        | 0.001        |
| 19  | rs10420999        | rs2264683        | 22798253         | 24490299         | 1692.046        | 143        | 11.832       | 1            | 0            |
| 20  | exm2260923        | exm1533489       | 29419620         | 31619515         | 2199.895        | 419        | 5.25         | 0.99         | 0.007        |
| 20  | rs6059703         | newsr139021763   | 32768431         | 34055380         | 1286.949        | 384        | 3.351        | 0.997        | 0.003        |
| 20  | exm1556774        | exm1562040       | 61288242         | 62904863         | 1616.621        | 862        | 1.875        | 1            | 0            |
| X   | exm1625831        | rs6527891        | 2700157          | 13686375         | 10986.218       | 1215       | 9.042        | 0.999        | 0.001        |
| X   | rs4333771         | rs4313320        | 14167680         | 15424686         | 1257.006        | 119        | 10.563       | 0.992        | 0.008        |
| X   | rs2050064         | rs5971539        | 29503266         | 31029701         | 1526.435        | 142        | 10.75        | 1            | 0            |
| X   | exm1637108        | rs6520404        | 47917867         | 49049285         | 1131.418        | 208        | 5.44         | 0.99         | 0.01         |
| X   | rs4826654         | exm1640749       | 50628606         | 53457578         | 2828.972        | 136        | 20.801       | 0.993        | 0.007        |
| X   | rs12841749        | rs5965551        | 62620778         | 67555179         | 4934.401        | 268        | 18.412       | 1            | 0            |
| X   | rs28521091        | indel.108442     | 76638703         | 77913836         | 1275.133        | 113        | 11.284       | 0.982        | 0.009        |
| X   | rs1841135         | exm1656858       | 124669231        | 129058951        | 4389.72         | 322        | 13.633       | 0.997        | 0.003        |
| X   | exm2273223        | rs11152537       | 181779           | 3582703          | 3400.924        | 150        | 22.673       | 1            | 0            |

In bold: homozygosity region comprising the *SHH-LMBR1* locus. CHR: Chromosome; SNP1: SNP at start of region; SNP2: SNP at end of region; POS1: Physical position (bp) of SNP1; POS2: Physical position (bp) of SNP2; KB: Length of region (kb); NSNP: Number of SNPs in run; DENSITY: Average SNP density (1 SNP per kb); PHOM: Proportion of sites homozygous; PHET: Proportion of sites heterozygous.



**Supplementary Table 2 | Coordinates of human and mouse CTCF sites.**

Coordinates for LSC1-7 and i3# are based on ChIP-seq peaks and i5#, ZRS#, i4# and CTCF3-5\* are based on publications<sup>3,2</sup>.

| <b>Name</b> | <b>Coordinate human (hg19)</b> |
|-------------|--------------------------------|
| LSC1        | chr7:156266047-156266716       |
| LSC2        | chr7:156556580-156557319       |
| LSC3        | chr7:156609512-156610181       |
| LSC4        | chr7:156613060-156613729       |
| LSC5        | chr7:156620116-156620785       |
| LSC6        | chr7:156685860-156686529       |
| LSC7        | chr7:156701434-156702103       |

| <b>Name</b> | <b>Coordinate mouse (mm9)</b> |
|-------------|-------------------------------|
| LSC1        | chr5:29363224-29363591        |
| CTCF3*      | chr5:29619575-29620326        |
| CTCF4*      | chr5:29704457-29705661        |
| CTCF5*      | chr5:29715776-29716437        |
| i5#         | chr5:29619921-29619969        |
| ZRS#        | chr5:29641336-29641385        |
| i4#         | chr5:29662545-29662612        |
| i3#         | chr5:29709136-29709762        |

### Supplementary Table 3 |

### Sequence of PCR primers, fosmid probes and sgRNAs used in this study.

#### Sanger sequence for acheiropodia family

| Amplicon                      | Name     | Sequence 5'>3'          |
|-------------------------------|----------|-------------------------|
| <i>LMBR1</i> wild-type allele | LMBR1-F1 | ATGATGCAGGTTGTA ACTACAG |
|                               | LMBR1-R1 | GTGATTTGTGAGCATTGCCT    |
| <i>LMBR1</i> wild-type allele | LMBR1-F2 | CTCAATAGACACCGCATTTCCT  |
|                               | LMBR1-R2 | TGGTGAGATTTTGGATTTGATCT |
| <i>LMBR1</i> deleted allele   | LMBR1-F1 | ATGATGCAGGTTGTA ACTACAG |
|                               | LMBR1-R2 | TGGTGAGATTTTGGATTTGATCT |
| ZRS                           | ZRS-F1   | GAGGTATAACCTCTGGCCAGTG  |
|                               | ZRS-R1   | CGCTTCCACCTGGTCAGTCC    |

#### Cloning for LacZ transgenic assay

5' and 3' end of 12 kb are in bold.

LacZ vector overlapping sequences for NEBuilder HiFi DNA Assembly cloning are italicized.

| Amplicon                      | Name   | Sequence 5'>3'                                                     |
|-------------------------------|--------|--------------------------------------------------------------------|
| Acheiropodia associated 12 kb | LacZ-F | <i>GCTGCAGGAATTCGATATCA<b>AAAAATTCAAATTC</b>TTCTCTAGATGTCAAAGT</i> |
|                               | LacZ-R | <i>CGAGGTCGACGGTATCGATACGTACTTCTCCCTCCATGACTGGAGAAGC</i>           |

#### 4C-seq

1st round PCR: Genomic regions are in bold.

2nd round PCR: P5 adapter (green), P7 adapter (blue), index (brown)

|                                                 | Name                  | Sequence 5'>3'                                                    |
|-------------------------------------------------|-----------------------|-------------------------------------------------------------------|
| 1st round PCR for <i>SHH</i> promoter viewpoint | hSHH2-2step-4C-F      | TACACGACGCTCTCCGATCT <b>AGGAGCAGAGTTAAGCTGAGATC</b>               |
|                                                 | hSHH2-2step-4C-R      | ACTGGAGTTCAGACGTGTGCTCTCCGATCT <b>TCCTCAATCCTCCGAGGCAC</b>        |
| 2nd round PCR for adapter/index                 | 4C-2nd-Univ-F         | <b>AATGATACGGCGACCACCGAGATCT</b> ACACTCTTCCCTACACGACGCTCTCCGATCT  |
|                                                 | 4C-index2-R           | <b>CAAGCAGAAGACGGCATAACGAGATACAT</b> CGGTGACTGGAGTTCAGACGTGTGCT   |
|                                                 | 4C-index23-R          | <b>CAAGCAGAAGACGGCATAACGAGATATCCACTC</b> GTGACTGGAGTTCAGACGTGTGCT |
|                                                 | 4C-index5-R           | <b>CAAGCAGAAGACGGCATAACGAGATCACTGT</b> GTGACTGGAGTTCAGACGTGTGCT   |
|                                                 | 4C-index6-R           | <b>CAAGCAGAAGACGGCATAACGAGATATTGGC</b> GTGACTGGAGTTCAGACGTGTGCT   |
| Hiseq4000 SE50 sequencing                       | Custom-reading-primer | CTTCCGATCTAGGAGCAGAGTTAAGCTGAGATC                                 |

### gRNA for generating knockout mice

| Name   | PAM motif | Sequence 5'>3'       |
|--------|-----------|----------------------|
| gRNA-1 | TGG       | GTAGCTAGAAGTGGAGAGCC |
| gRNA-2 | AGG       | GAACTCATAAGATCCGTTTG |

### Sanger sequencing for knockout mice

| Amplicon                            | Name              | Sequence 5'>3'         |
|-------------------------------------|-------------------|------------------------|
| Mouse acheiropodia associated 12 kb | mLMBR12kb-KO/WT-F | GCATAGCCTAAGTGGCACAGGA |
|                                     | mLMBR12kb-KO/WT-R | TGTGACTTGCTGACTTATCCCT |

### qPCR primer

| Amplicon                     | Name    | Sequence 5'>3'           |
|------------------------------|---------|--------------------------|
| Mouse <i>Shh</i> mRNA        | ShhFw   | ACCCCGACATCATATTTAAGGA   |
|                              | ShhRev  | TTAACTTGCTTTGCACCTCTGA   |
| Mouse <i>Beta-Actin</i> mRNA | Actb-F  | GGCACCACACCTTCTACAATG    |
|                              | Actb-R  | GGGGTGTGAAGGTCTCAAAC     |
| Human <i>SHH</i> mRNA        | hSHH-F2 | GGAAGCAGCCTCCCGATTT      |
|                              | hSHH-R2 | AGTGGACATCACCACGTCTG     |
| Human <i>HPRT</i> mRNA       | hHPRT-F | TCCTTGGTCAGGAGTATAATCC   |
|                              | hHPRT-R | GTCAAGGGCATATCCTACAACAAA |

### Fosmid probes

| Region     | Fosmid ID     | Coordinates (mm9)         |
|------------|---------------|---------------------------|
| <i>SHH</i> | G248P82324G11 | Chr7: 155585515-155620891 |
| LSC1       | G248P83074E9  | Chr7: 156248055-156288749 |
| LSC2       | G248P80007C10 | Chr7: 156537478-156580173 |
| LSC3-5     | G248P8090C7   | Chr7: 156591166-156630143 |

## Supplementary References

1. Mumbach, M. R. *et al.* HiChIRP reveals RNA-associated chromosome conformation. *Nat. Methods* **16**, 489–492 (2019).
2. Paliou, C. *et al.* Preformed chromatin topology assists transcriptional robustness of Shh during limb development. *Proc. Natl. Acad. Sci. U. S. A.* **116**, 12390–12399 (2019).
3. Williamson, I. *et al.* Developmentally regulated Shh expression is robust to TAD perturbations. *Development* **146**, (2019).
4. Yue, F. *et al.* A comparative encyclopedia of DNA elements in the mouse genome. *Nature* **515**, 355–64 (2014).
5. Fornes, O. *et al.* JASPAR 2020: update of the open-access database of transcription factor binding profiles. *Nucleic Acids Res.* **48**, D87–D92 (2020).
6. Grant, C. E., Bailey, T. L. & Noble, W. S. FIMO: scanning for occurrences of a given motif. *Bioinformatics* **27**, 1017–8 (2011).
7. Kent, W. J. *et al.* The human genome browser at UCSC. *Genome Res.* **12**, 996–1006 (2002).
8. Wang, Y. *et al.* The 3D Genome Browser: a web-based browser for visualizing 3D genome organization and long-range chromatin interactions. *Genome Biol.* **19**, 151 (2018).
