# Supplementary material for: Deletion of CTCF sites in the SHH locus alters enhancer–promoter interactions and leads to acheiropodia
Source: PubMed Central journal article supplement (PMC8052326; doi:10.1038/s41467-021-22470-z), 2021-04-16
Supplement: 41467_2021_22470_MOESM2_ESM.pdf [file 41467_2021_22470_MOESM2_ESM.pdf]

## Reporting Summary

Nature Research wishes to improve the reproducibility of the work that we publish. This form provides structure for consistency and transparency in reporting. For further information on Nature Research policies, see our [Editorial Policies](#) and the [Editorial Policy Checklist](#).

### Statistics

For all statistical analyses, confirm that the following items are present in the figure legend, table legend, main text, or Methods section.

n/a Confirmed

- The exact sample size ( $n$ ) for each experimental group/condition, given as a discrete number and unit of measurement
- A statement on whether measurements were taken from distinct samples or whether the same sample was measured repeatedly
- The statistical test(s) used AND whether they are one- or two-sided  
*Only common tests should be described solely by name; describe more complex techniques in the Methods section.*
- A description of all covariates tested
- A description of any assumptions or corrections, such as tests of normality and adjustment for multiple comparisons
- A full description of the statistical parameters including central tendency (e.g. means) or other basic estimates (e.g. regression coefficient) AND variation (e.g. standard deviation) or associated estimates of uncertainty (e.g. confidence intervals)
- For null hypothesis testing, the test statistic (e.g.  $F$ ,  $t$ ,  $r$ ) with confidence intervals, effect sizes, degrees of freedom and  $P$  value noted  
*Give  $P$  values as exact values whenever suitable.*
- For Bayesian analysis, information on the choice of priors and Markov chain Monte Carlo settings
- For hierarchical and complex designs, identification of the appropriate level for tests and full reporting of outcomes
- Estimates of effect sizes (e.g. Cohen's  $d$ , Pearson's  $r$ ), indicating how they were calculated

*Our web collection on [statistics for biologists](#) contains articles on many of the points above.*

### Software and code

Policy information about [availability of computer code](#)

Data collection

Data analysis

For manuscripts utilizing custom algorithms or software that are central to the research but not yet described in published literature, software must be made available to editors and reviewers. We strongly encourage code deposition in a community repository (e.g. GitHub). See the Nature Research [guidelines for submitting code & software](#) for further information.

## Data

Policy information about [availability of data](#)

All manuscripts must include a [data availability statement](#). This statement should provide the following information, where applicable:

- Accession codes, unique identifiers, or web links for publicly available datasets
- A list of figures that have associated raw data
- A description of any restrictions on data availability

hg19 reference genome is available from NCBI (GenBank assembly accession: GCA\_000001405.1).

hg38 reference genome is available from NCBI (GenBank assembly accession: GCA\_000001405.15).

The deleted sequences information is available at Decipher database (#411659).

ChIP-seq and 4C-seq data are available at the GEO website (Accession number: GSE155324).

## Field-specific reporting

Please select the one below that is the best fit for your research. If you are not sure, read the appropriate sections before making your selection.

- Life sciences  Behavioural & social sciences  Ecological, evolutionary & environmental sciences

For a reference copy of the document with all sections, see [nature.com/documents/nr-reporting-summary-flat.pdf](https://www.nature.com/documents/nr-reporting-summary-flat.pdf)

## Life sciences study design

All studies must disclose on these points even when the disclosure is negative.

|                 |                                                                                                                                                                                                                                                                                                                                                                                                                                         |
|-----------------|-----------------------------------------------------------------------------------------------------------------------------------------------------------------------------------------------------------------------------------------------------------------------------------------------------------------------------------------------------------------------------------------------------------------------------------------|
| Sample size     | No statistical method was used to pre-determine the sample size for the animal experiments. Sample size was determined to obtain reproducibility and reliable distribution among biologically independent samples, based on extensive laboratory experience and literature in this field (Paliou et al. PNAS (2019) PMID: 31147463, Williamson et al. Development (2019) PMID: 31511252). Sample sizes are described in the manuscript. |
| Data exclusions | No data were excluded from analyses.                                                                                                                                                                                                                                                                                                                                                                                                    |
| Replication     | For ChIP-seq and 4C-seq, two technical replicates were used. All attempts were successful. All replicate data are shown in Fig S5 and S6.                                                                                                                                                                                                                                                                                               |
| Randomization   | Control wild type and knockout mice used for analysis were chosen randomly.                                                                                                                                                                                                                                                                                                                                                             |
| Blinding        | Sample preparation, sequencing and computational analysis were performed by different researchers. The investigators were not blinded during sample preparation due to feasibility of experiments. For computational analysis, sample names were blinded until the final outputs were generated.                                                                                                                                        |

## Reporting for specific materials, systems and methods

We require information from authors about some types of materials, experimental systems and methods used in many studies. Here, indicate whether each material, system or method listed is relevant to your study. If you are not sure if a list item applies to your research, read the appropriate section before selecting a response.

### Materials & experimental systems

| n/a                                 | Involved in the study                                           |
|-------------------------------------|-----------------------------------------------------------------|
| <input type="checkbox"/>            | <input checked="" type="checkbox"/> Antibodies                  |
| <input type="checkbox"/>            | <input checked="" type="checkbox"/> Eukaryotic cell lines       |
| <input checked="" type="checkbox"/> | <input type="checkbox"/> Palaeontology and archaeology          |
| <input type="checkbox"/>            | <input checked="" type="checkbox"/> Animals and other organisms |
| <input type="checkbox"/>            | <input checked="" type="checkbox"/> Human research participants |
| <input checked="" type="checkbox"/> | <input type="checkbox"/> Clinical data                          |
| <input checked="" type="checkbox"/> | <input type="checkbox"/> Dual use research of concern           |

### Methods

| n/a                                 | Involved in the study                           |
|-------------------------------------|-------------------------------------------------|
| <input type="checkbox"/>            | <input checked="" type="checkbox"/> ChIP-seq    |
| <input checked="" type="checkbox"/> | <input type="checkbox"/> Flow cytometry         |
| <input checked="" type="checkbox"/> | <input type="checkbox"/> MRI-based neuroimaging |

## Antibodies

|                 |                                                                                                                                                                                                          |
|-----------------|----------------------------------------------------------------------------------------------------------------------------------------------------------------------------------------------------------|
| Antibodies used | CTCF (Active Motif, catalog no. 61311)<br>RAD21 (Abcam, catalog no. ab992)<br>Six µg of antibody was used for the binding with magnetic beads (final concentration was 60ng/µL in the binding reaction). |
| Validation      | All antibodies have been extensively used in other studies:                                                                                                                                              |

CTCF: Rodríguez-Carballo, Eddie, et al. "The HoxD cluster is a dynamic and resilient TAD boundary controlling the segregation of antagonistic regulatory landscapes." *Genes & development* 31.22 (2017): 2264-2281.

RAD21: Schwarzer, Wibke, et al. "Two independent modes of chromatin organization revealed by cohesin removal." *Nature* 551.7678 (2017): 51-56.

## Eukaryotic cell lines

Policy information about [cell lines](#)

|                                                                      |                                                                                                                                                                                                                                                                                                                                                                         |
|----------------------------------------------------------------------|-------------------------------------------------------------------------------------------------------------------------------------------------------------------------------------------------------------------------------------------------------------------------------------------------------------------------------------------------------------------------|
| Cell line source(s)                                                  | Lymphoblastoid cells were from the proband, parents.<br>WT lymphoblastoid cells were a kind gift from Dr. Jorge Oksenberg at UCSF.                                                                                                                                                                                                                                      |
| Authentication                                                       | The study was approved by the ethical committee of the University of California San Francisco, protocol number 10-03111, Comitê de Ética em Pesquisa da Prefeitura de Porto Alegre (Plataforma Brasil) protocol number 1.103.654 and the Brazilian Research Ethics Commission (CONEP) protocol number 223.811. Samples were obtained after receipt of informed consent. |
| Mycoplasma contamination                                             | Not tested.                                                                                                                                                                                                                                                                                                                                                             |
| Commonly misidentified lines<br>(See <a href="#">ICLAC</a> register) | No commonly misidentified cell lines were used.                                                                                                                                                                                                                                                                                                                         |

## Animals and other organisms

Policy information about [studies involving animals](#); [ARRIVE guidelines](#) recommended for reporting animal research

|                         |                                                                                                                                                                                                                                                                                                                                                                                                                                                                                                                                        |
|-------------------------|----------------------------------------------------------------------------------------------------------------------------------------------------------------------------------------------------------------------------------------------------------------------------------------------------------------------------------------------------------------------------------------------------------------------------------------------------------------------------------------------------------------------------------------|
| Laboratory animals      | FVB (Jackson Laboratory, catalog no. 001800) was used for all experiment.<br>Animals were used for the experiment at embryonic day(E)11.5 or E18.8 as described in the figure legends.<br>Both male and female were used for analysis.<br>All animals were maintained in a temperature-controlled room (temperature 19.4- 23.3 °C , humidity 30-70%) on a 12 h light/dark cycle with light onset at 7am.<br>LMBR 12 kb deletion allele was generated by iGONAD method. Please see "Generation of knockout mice" section in manuscript. |
| Wild animals            | No wild animals were used in this research.                                                                                                                                                                                                                                                                                                                                                                                                                                                                                            |
| Field-collected samples | No field-collected samples were used in this research.                                                                                                                                                                                                                                                                                                                                                                                                                                                                                 |
| Ethics oversight        | Mouse work was approved by the UCSF IACUC, protocol number AN100466, and was conducted in accordance with AALAC and NIH guidelines.                                                                                                                                                                                                                                                                                                                                                                                                    |

Note that full information on the approval of the study protocol must also be provided in the manuscript.

## Human research participants

Policy information about [studies involving human research participants](#)

|                            |                                                                                                                                                                                                                                                                                                                |
|----------------------------|----------------------------------------------------------------------------------------------------------------------------------------------------------------------------------------------------------------------------------------------------------------------------------------------------------------|
| Population characteristics | The acheiropodia family (parents and affected individual) were recruited and selected for this study due to the acheiropodia phenotype that the affected individual has.                                                                                                                                       |
| Recruitment                | The family was recruited during medical examination and all samples and photos were obtained after receipt of informed consent.                                                                                                                                                                                |
| Ethics oversight           | The study was approved by the ethical committee of the University of California San Francisco, protocol number 10-03111, Comitê de Ética em Pesquisa da Prefeitura de Porto Alegre (Plataforma Brasil) protocol number 1.103.654 and the Brazilian Research Ethics Commission (CONEP) protocol number 223.811. |

Note that full information on the approval of the study protocol must also be provided in the manuscript.

## ChIP-seq

### Data deposition

Confirm that both raw and final processed data have been deposited in a public database such as [GEO](#).

Confirm that you have deposited or provided access to graph files (e.g. BED files) for the called peaks.

|                                                                    |                                                                                                                                                                                                  |
|--------------------------------------------------------------------|--------------------------------------------------------------------------------------------------------------------------------------------------------------------------------------------------|
| Data access links<br><i>May remain private before publication.</i> | ChIP-seq and 4C-seq data are available at the GEO website. Accession number is GSE155324.                                                                                                        |
| Files in database submission                                       | GSM4699144 CTCF-ChIP-seq-Mut-rep1<br>GSM4699145 CTCF-ChIP-seq-INPUT-Mut-rep1<br>GSM4699146 CTCF-ChIP-seq-Mut-rep2<br>GSM4699147 CTCF-ChIP-seq-INPUT-Mut-rep2<br>GSM4699148 CTCF-ChIP-seq-WT-rep1 |

GSM4699149 CTCF-ChIP-seq-INPUT-WT-rep1  
 GSM4699150 CTCF-ChIP-seq-WT-rep2  
 GSM4699151 CTCF-ChIP-seq-INPUT-WT-rep2  
 GSM4699152 RAD21-ChIP-seq-Mut-rep1  
 GSM4699153 RAD21-ChIP-seq-INPUT-Mut-rep1  
 GSM4699154 RAD21-ChIP-seq-Mut-rep2  
 GSM4699155 RAD21-ChIP-seq-INPUT-Mut-rep2  
 GSM4699156 RAD21-ChIP-seq-WT-rep1  
 GSM4699157 RAD21-ChIP-seq-INPUT-WT-rep1  
 GSM4699158 RAD21-ChIP-seq-WT-rep2  
 GSM4699159 RAD21-ChIP-seq-INPUT-WT-rep2  
 GSM4699160 4C-seq-SHH-viewpoint-WT-rep1  
 GSM4699161 4C-seq-SHH-viewpoint-WT-rep2  
 GSM4699162 4C-seq-SHH-viewpoint-Mut-rep1  
 GSM4699163 4C-seq-SHH-viewpoint-Mut-rep2

Genome browser session  
 (e.g. [UCSC](#))

Not available.

## Methodology

|                         |                                                                                                                                                                                                                                                                                                                                                                                                                    |
|-------------------------|--------------------------------------------------------------------------------------------------------------------------------------------------------------------------------------------------------------------------------------------------------------------------------------------------------------------------------------------------------------------------------------------------------------------|
| Replicates              | Two biological replicates.                                                                                                                                                                                                                                                                                                                                                                                         |
| Sequencing depth        | 30-50M reads.                                                                                                                                                                                                                                                                                                                                                                                                      |
| Antibodies              | CTCF (Active Motif, catalog no. 61311)<br>RAD21 (Abcam, catalog no. ab992)                                                                                                                                                                                                                                                                                                                                         |
| Peak calling parameters | The ChIP-seq raw reads were mapped against the hg19 with bowtie2(2.2.6) , duplication were removed with Picard (1.126) MarkDuplicates and peaks were called using MACS2(v2.1.1 -p 1e-2 --nomodel --shift 0 --keep-dup all -B --SPMR), Reproducible peaks were identified by IDR(2.0.4) at a threshold of 5%.Then the differential enrichment analysis between Mutation and Wildtype is performed by DiffBind(3.11) |
| Data quality            | Number of peaks called:<br>CTCF-Mut_rep1 61241<br>CTCF-Mut_rep2 42333<br>CTCF-Mut_pool 61995<br>CTCF-WT_rep1 39590<br>CTCF-WT_rep2 35961<br>CTCF-WT_pool 43634<br>RAD21-Mut_rep1 62861<br>RAD21-Mut_rep2 43189<br>RAD21-Mut_pool 50140<br>RAD21-WT_rep1 59137<br>RAD21-WT_rep2 62438<br>RAD21-WT_pool 57879                                                                                                        |
| Software                | MACS2(v2.1.1), bowtie2(2.2.6), IDR(2.0.4), SAMtools(1.7),Picard (1.126), bedtools (2.26.0), IDR(2.0.4), DiffBind(3.11)                                                                                                                                                                                                                                                                                             |
